# Supplementary material for: Low-temperature deep oxidation of N,N-dimethylformamide (DMF) over CeCu binary oxides
Source: Royal Society of Chemistry journal article supplement (doi:10.1039/d3cy00265a), 2023-01-01
Supplement: d3cy00265a1.pdf [file d3cy00265a1.pdf]

## Electronic Supporting Information

### Low-temperature deep oxidation of N, N-dimethylformamide (DMF) over CeCu binary oxides

Cedric Karel Fonzeu Monguen<sup>a,b</sup>, Samuel Daniel<sup>a,b</sup>, Zhen-Yu Tian<sup>a,b,\*</sup>

<sup>a</sup> Institute of Engineering Thermophysics, Chinese Academy of Sciences, Beijing 100190, China

<sup>b</sup> University of Chinese Academy of Sciences, Beijing 100049, China

#### Table of Contents

|                                                           |    |
|-----------------------------------------------------------|----|
| <b>Section 1:</b> Preparation method .....                | 1  |
| <b>Section 2:</b> Catalytic test experimental setup ..... | 2  |
| <b>Section 3:</b> Structural properties .....             | 4  |
| <b>Section 4:</b> Ionic states configuration .....        | 7  |
| <b>Section 5:</b> Redox properties .....                  | 11 |
| <b>Section 6:</b> Catalytic activity .....                | 12 |
| <b>References</b> .....                                   | 13 |

## Section 1: Preparation method

The powders were fabricated by Sol-gel method.

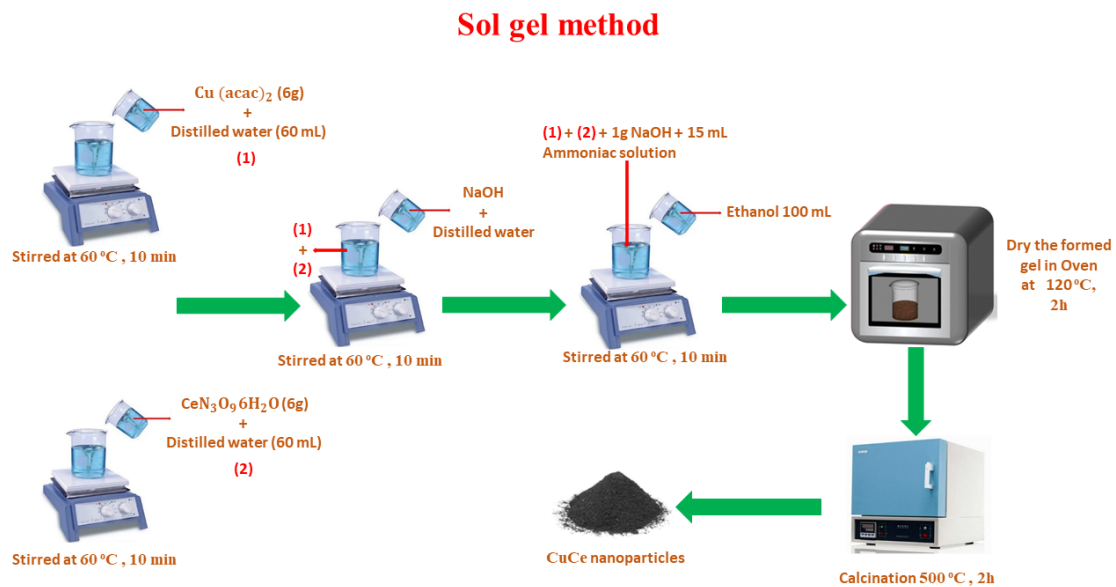

**Figure S1.** Sol-gel setup for the nanoparticles catalyst preparation <sup>1,2</sup>.

## Section 2: Catalytic test experimental setup

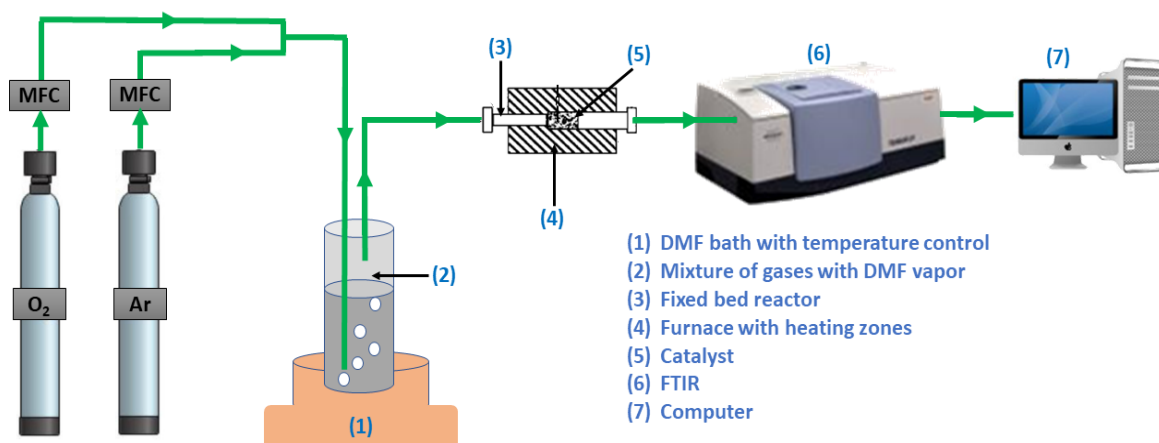

**Figure S2.** The catalytic test system connected to the FTIR equipment.

### Section 3: Structural properties

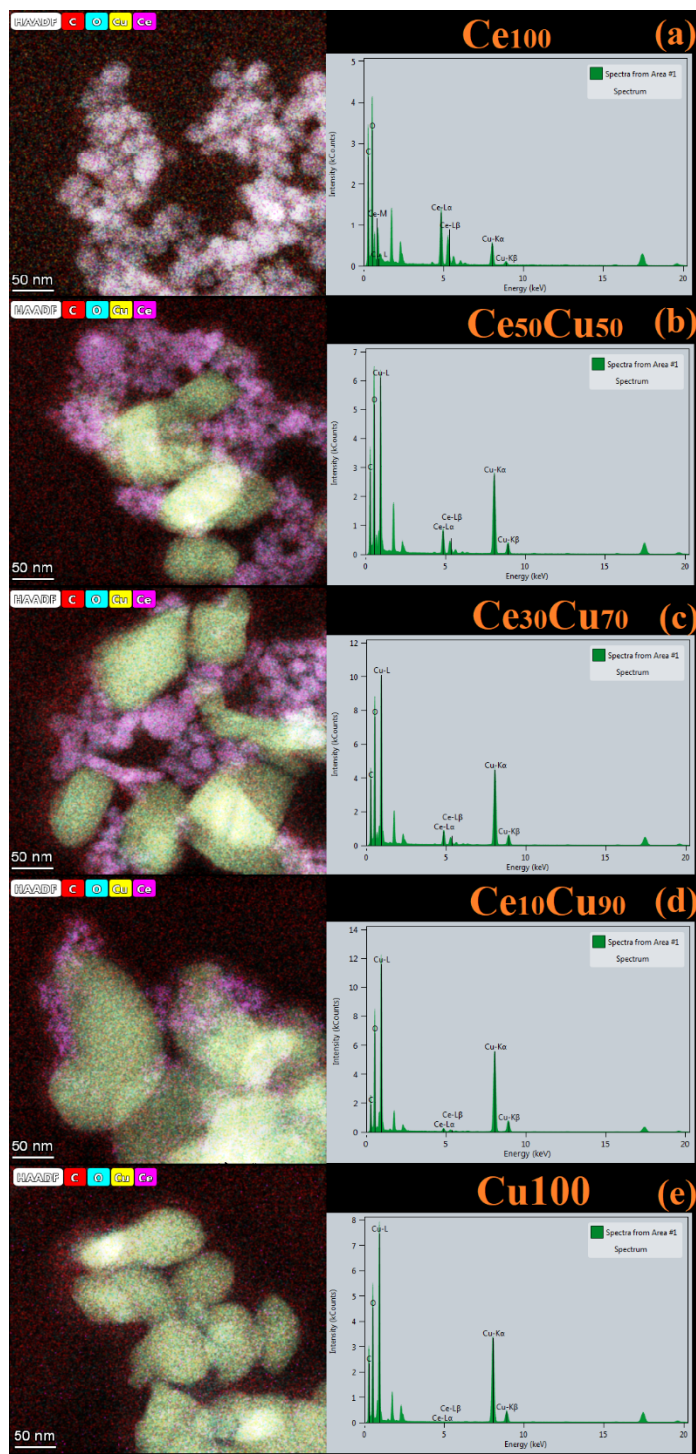

**Figure S3.** EDS-HAADF images of CuCe samples; Ce<sub>100</sub>(a), Ce<sub>50</sub>Cu<sub>50</sub>(b), Ce<sub>30</sub>Cu<sub>70</sub>(c), Ce<sub>10</sub>Cu<sub>90</sub>(d), Cu<sub>100</sub>.

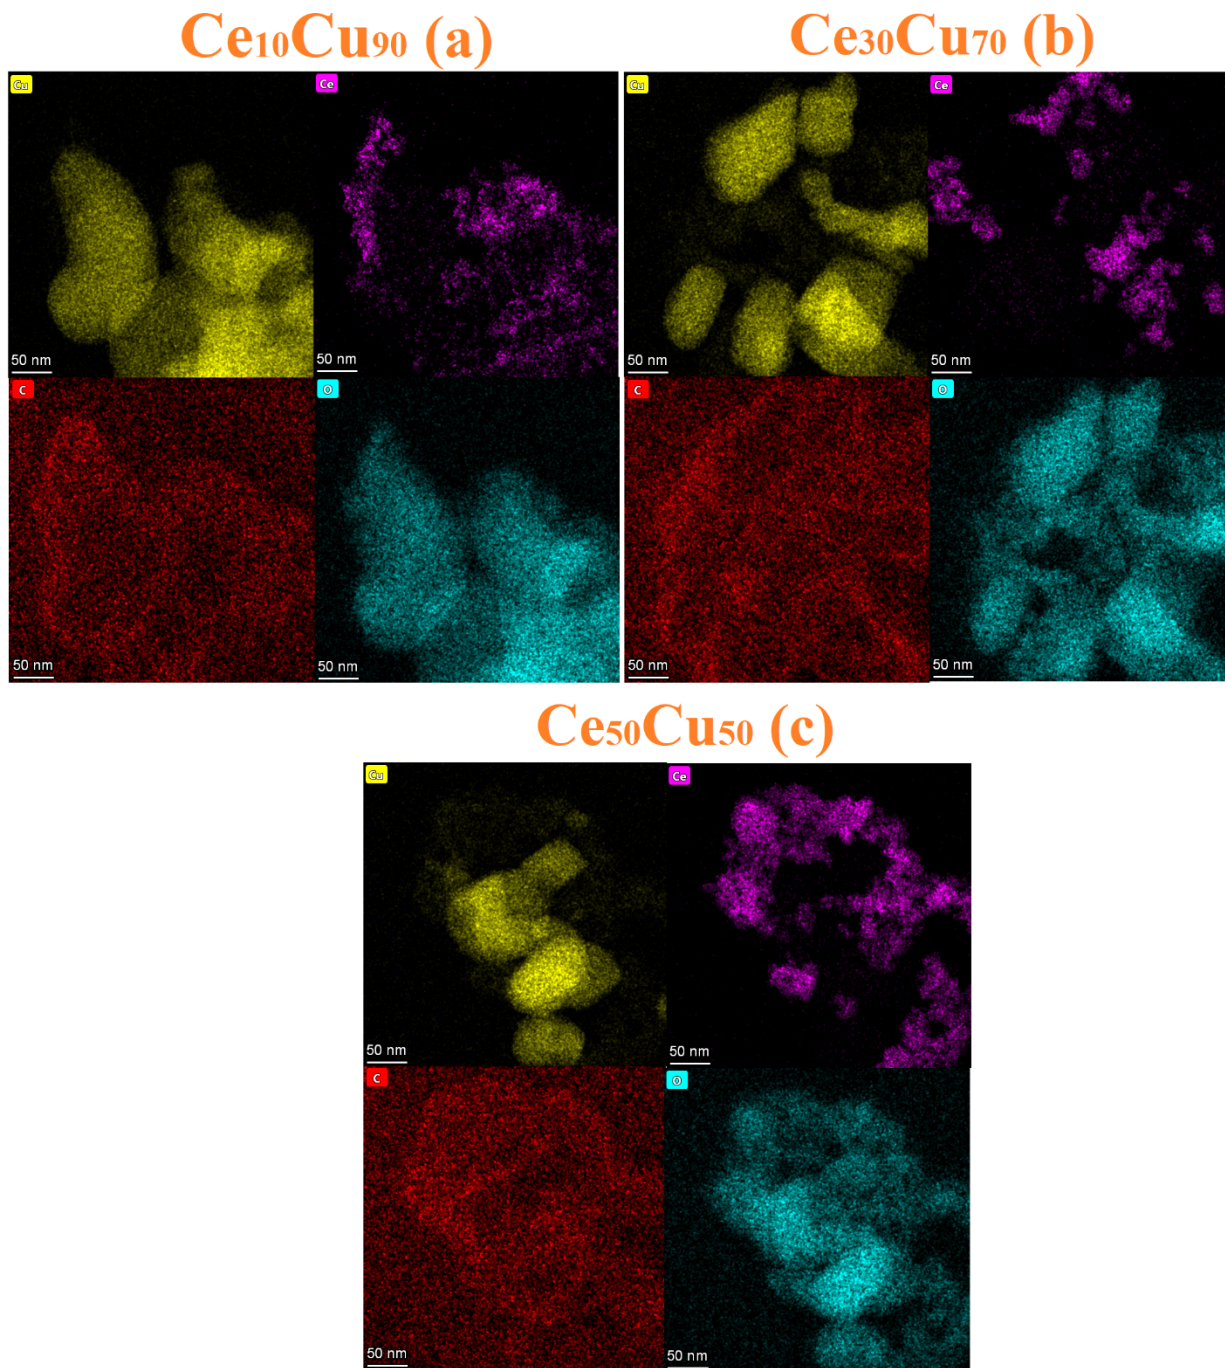

**Figure S4.** Fine-Element mapping images of CuCe samples; Ce<sub>10</sub>Cu<sub>90</sub> (a), Ce<sub>30</sub>Cu<sub>70</sub> (b), and Ce<sub>50</sub>Cu<sub>50</sub>(c).

**Table S1** Crystallite size and micro-strain of thin-films samples.

| Samples                               | hkl | FWHM ( $\beta$ ) ( $^{\circ}$ ) | $2\theta$ ( $^{\circ}$ ) | Crystallite size D (nm) | D average (nm) | Micro-strain $\epsilon$ (%) | $\epsilon$ average (%) |
|---------------------------------------|-----|---------------------------------|--------------------------|-------------------------|----------------|-----------------------------|------------------------|
| <b>Ce<sub>100</sub></b>               | 110 | 0.41                            | 35.47                    | 20.34                   | 20.20          | 0.11                        | 0.12                   |
|                                       | 111 | 0.42                            | 38.69                    | 20.05                   |                | 0.13                        |                        |
| <b>Ce<sub>50</sub>Cu<sub>50</sub></b> | 110 | 0.46                            | 35.47                    | 18.13                   | 18.42          | 0.13                        | 0.13                   |
|                                       | 111 | 0.45                            | 38.69                    | 18.71                   |                | 0.14                        |                        |
| <b>Ce<sub>30</sub>Cu<sub>70</sub></b> | 110 | 0.49                            | 35.47                    | 17.02                   | 17.28          | 0.14                        | 0.14                   |
|                                       | 111 | 0.48                            | 38.69                    | 17.54                   |                | 0.15                        |                        |
| <b>Ce<sub>10</sub>Cu<sub>90</sub></b> | 110 | 0.59                            | 35.47                    | 14.14                   | 14.87          | 0.16                        | 0.16                   |
|                                       | 111 | 0.54                            | 38.69                    | 15.59                   |                | 0.16                        |                        |
| <b>Cu<sub>100</sub></b>               | 110 | 0.63                            | 35.47                    | 13.24                   | 13.52          | 0.17                        | 0.18                   |
|                                       | 111 | 0.61                            | 38.69                    | 13.80                   |                | 0.19                        |                        |

**Note:** hkl refers to Miller indices,  $\theta$  refers to Bragg's angle, and FWHM refers to the full width at half maximum of the peak.

**Table S2** CeCu materials specific surface area.

| Samples                               | Surface area ( $\text{m}^2/\text{g}$ ) | Pore volume ( $\text{cm}^3/\text{g}$ ) | Pore size (nm) |
|---------------------------------------|----------------------------------------|----------------------------------------|----------------|
| <b>Ce<sub>100</sub><sup>3</sup></b>   | 3.775                                  | 0.009                                  | 25.703         |
| <b>Ce<sub>50</sub>Cu<sub>50</sub></b> | 4.962                                  | 0.027                                  | 28.660         |
| <b>Ce<sub>30</sub>Cu<sub>70</sub></b> | 5.319                                  | 0.031                                  | 39.382         |
| <b>Ce<sub>10</sub>Cu<sub>90</sub></b> | 6.146                                  | 0.034                                  | 41.689         |
| <b>Cu<sub>100</sub></b>               | 7.739                                  | 0.044                                  | 42.645         |

## Section 4: Ionic states configuration

**Table S3** Comparison of the relative contents of CeCu binary oxides using EDS and XPS.

| Samples                               | Type | Ce    | Cu    | C     | O     | Ce/O | Cu/O | Cu/Ce |
|---------------------------------------|------|-------|-------|-------|-------|------|------|-------|
| <b>Ce<sub>100</sub></b>               | XPS  | 5.77  | 0.00  | 29.11 | 65.12 | 0.09 | 0.00 | 0.00  |
|                                       | EDS  | 12.50 | 0.00  | 35.70 | 51.80 | 0.24 | 0.00 | 0.00  |
| <b>Ce<sub>50</sub>Cu<sub>50</sub></b> | XPS  | 4.05  | 5.86  | 36.47 | 53.62 | 0.08 | 0.11 | 1.45  |
|                                       | EDS  | 3.40  | 17.30 | 39.40 | 39.90 | 0.08 | 0.43 | 5.09  |
| <b>Ce<sub>30</sub>Cu<sub>70</sub></b> | XPS  | 3.34  | 6.87  | 39.66 | 50.13 | 0.07 | 0.14 | 2.06  |
|                                       | EDS  | 2.50  | 19.40 | 40.70 | 39.40 | 0.06 | 0.49 | 7.76  |
| <b>Ce<sub>10</sub>Cu<sub>90</sub></b> | XPS  | 1.05  | 8.83  | 40.45 | 49.67 | 0.02 | 0.18 | 8.41  |
|                                       | EDS  | 0.20  | 22.80 | 46.00 | 30.50 | 0.01 | 0.75 | 114   |
| <b>Cu<sub>100</sub></b>               | XPS  | 0.00  | 9.03  | 52.21 | 38.76 | 0.00 | 0.23 | -     |
|                                       | EDS  | 0.00  | 23.90 | 49.90 | 26.20 | 0.00 | 0.91 | -     |

**Table S4** Results of curve-fitting on the Ce 3*d* binding energies and relative atomic percentage for the five sets of catalysts.

| Catalysts                             | Parameters | Ce 3 <i>d</i> 5/2 |                  |                                    | Ce 3 <i>d</i> 3/2 |                  |                                    |
|---------------------------------------|------------|-------------------|------------------|------------------------------------|-------------------|------------------|------------------------------------|
|                                       |            | Ce <sup>3+</sup>  | Ce <sup>4+</sup> | Ce <sup>3+</sup> /Ce <sup>4+</sup> | Ce <sup>3+</sup>  | Ce <sup>4+</sup> | Ce <sup>3+</sup> /Ce <sup>4+</sup> |
| <b>Ce<sub>100</sub></b>               | Species    | Ce <sup>3+</sup>  | Ce <sup>4+</sup> | Ce <sup>3+</sup> /Ce <sup>4+</sup> | Ce <sup>3+</sup>  | Ce <sup>4+</sup> | Ce <sup>3+</sup> /Ce <sup>4+</sup> |
|                                       | BE (eV)    | 884.04            | 882.23           | 0.34                               | 900.70            | 898.14           | 0.36                               |
|                                       | RA (%)     | 25.36             | 74.64            |                                    | 26.46             | 73.54            |                                    |
| <b>Ce<sub>50</sub>Cu<sub>50</sub></b> | Species    | Ce <sup>3+</sup>  | Ce <sup>4+</sup> | Ce <sup>3+</sup> /Ce <sup>4+</sup> | Ce <sup>3+</sup>  | Ce <sup>4+</sup> | Ce <sup>3+</sup> /Ce <sup>4+</sup> |
|                                       | BE (eV)    | 884.33            | 882.16           | 0.39                               | 900.61            | 898.06           | 0.40                               |
|                                       | RA (%)     | 27.84             | 72.16            |                                    | 28.35             | 71.65            |                                    |
| <b>Ce<sub>30</sub>Cu<sub>70</sub></b> | Species    | Ce <sup>3+</sup>  | Ce <sup>4+</sup> | Ce <sup>3+</sup> /Ce <sup>4+</sup> | Ce <sup>3+</sup>  | Ce <sup>4+</sup> | Ce <sup>3+</sup> /Ce <sup>4+</sup> |
|                                       | BE (eV)    | 883.76            | 882.29           | 0.79                               | 900.95            | 898.24           | 0.70                               |
|                                       | RA (%)     | 44.24             | 55.76            |                                    | 41.30             | 58.70            |                                    |
| <b>Ce<sub>10</sub>Cu<sub>90</sub></b> | Species    | Ce <sup>3+</sup>  | Ce <sup>4+</sup> | Ce <sup>3+</sup> /Ce <sup>4+</sup> | Ce <sup>3+</sup>  | Ce <sup>4+</sup> | Ce <sup>3+</sup> /Ce <sup>4+</sup> |
|                                       | BE (eV)    | 883.79            | 882.30           | 1.13                               | 900.92            | 898.26           | 0.93                               |
|                                       | RA (%)     | 53.07             | 46.93            |                                    | 48.27             | 51.73            |                                    |
| <b>Cu<sub>100</sub></b>               | -          | -                 | -                | -                                  | -                 | -                | -                                  |

**Note:** BE refers to binding energy, and RA refers to the relative area of the peak.



**Table S5** Results of curve-fittings on the O 1s binding energies and relative atomic percentage for the four sets of catalysts

| Catalysts                         | Parameters | O 1s    |                 |                               |                 |                  |                                    |
|-----------------------------------|------------|---------|-----------------|-------------------------------|-----------------|------------------|------------------------------------|
|                                   |            | Species | O <sup>2-</sup> | CO <sub>3</sub> <sup>2-</sup> | OH <sup>-</sup> | H <sub>2</sub> O | O <sub>Lat</sub> /O <sub>Ads</sub> |
| Ce <sub>100</sub>                 | BE (eV)    | 529.20  | 531.17          | 532.74                        | 535.86          | 0.22             | 0.32                               |
|                                   | RA (%)     | 17.88   | 16.27           | 50.60                         | 15.20           |                  |                                    |
| Ce <sub>50</sub> Cu <sub>50</sub> | BE (eV)    | 529.43  | 531.13          | 532.32                        | 535.13          | 0.32             | 1.90                               |
|                                   | RA (%)     | 24.51   | 42.16           | 22.23                         | 11.10           |                  |                                    |
| Ce <sub>30</sub> Cu <sub>70</sub> | BE (eV)    | 529.35  | 531.22          | 532.61                        | 535.38          | 0.34             | 2.60                               |
|                                   | RA (%)     | 25.92   | 45.72           | 17.56                         | 10.80           |                  |                                    |
| Ce <sub>10</sub> Cu <sub>90</sub> | BE (eV)    | 529.58  | 531.17          | 533.01                        | 535.51          | 0.38             | 3.24                               |
|                                   | RA (%)     | 27.63   | 48.75           | 15.05                         | 8.57            |                  |                                    |
| Cu <sub>100</sub>                 | BE (eV)    | 529.57  | 531.36          | 532.65                        | 535.37          | 0.43             | 3.40                               |
|                                   | RA (%)     | 29.92   | 49.13           | 14.44                         | 6.51            |                  |                                    |

**Note:** BE refers to the binding energy; O<sub>Lat</sub> refers to the lattice oxygen; O<sub>Ads</sub> refers to the adsorption oxygen; RA refers to the relative area of the peak.

**Table S6** Results of curve-fitting on the Cu 2*p* binding energies and relative atomic percentage for the five sets of catalysts.

| Catalysts                             | Parameters | Cu 2 <i>p</i> 3/2 |                 |                                       | Cu 2 <i>p</i> 1/2 |                 |                                       |
|---------------------------------------|------------|-------------------|-----------------|---------------------------------------|-------------------|-----------------|---------------------------------------|
| <b>Ce<sub>100</sub></b>               | -          | -                 | -               | -                                     | -                 | -               | -                                     |
|                                       | Species    | Cu <sup>2+</sup>  | Cu <sup>+</sup> | <b>Cu<sup>2+</sup>/Cu<sup>+</sup></b> | Cu <sup>2+</sup>  | Cu <sup>+</sup> | <b>Cu<sup>2+</sup>/Cu<sup>+</sup></b> |
| <b>Ce<sub>50</sub>Cu<sub>50</sub></b> | BE (eV)    | 934.74            | 933.52          | 0.60                                  | 954.45            | 952.98          | 0.56                                  |
|                                       | RA (%)     | 37.42             | 62.58           |                                       | 35.98             | 64.02           |                                       |
|                                       | Species    | Cu <sup>2+</sup>  | Cu <sup>+</sup> | <b>Cu<sup>2+</sup>/Cu<sup>+</sup></b> | Cu <sup>2+</sup>  | Cu <sup>+</sup> | <b>Cu<sup>2+</sup>/Cu<sup>+</sup></b> |
| <b>Ce<sub>30</sub>Cu<sub>70</sub></b> | BE (eV)    | 934.67            | 933.10          | 0.66                                  | 954.43            | 952.84          | 0.66                                  |
|                                       | RA (%)     | 39.69             | 60.31           |                                       | 39.72             | 60.28           |                                       |
|                                       | Species    | Cu <sup>2+</sup>  | Cu <sup>+</sup> | <b>Cu<sup>2+</sup>/Cu<sup>+</sup></b> | Cu <sup>2+</sup>  | Cu <sup>+</sup> | <b>Cu<sup>2+</sup>/Cu<sup>+</sup></b> |
| <b>Ce<sub>10</sub>Cu<sub>90</sub></b> | BE (eV)    | 935.03            | 933.26          | 0.80                                  | 954.86            | 953.09          | 0.80                                  |
|                                       | RA (%)     | 44.42             | 55.58           |                                       | 43.80             | 56.20           |                                       |
|                                       | Species    | Cu <sup>2+</sup>  | Cu <sup>+</sup> | <b>Cu<sup>2+</sup>/Cu<sup>+</sup></b> | Cu <sup>2+</sup>  | Cu <sup>+</sup> | <b>Cu<sup>2+</sup>/Cu<sup>+</sup></b> |
| <b>Cu<sub>100</sub></b>               | BE (eV)    | 935.08            | 933.57          | 0.92                                  | 954.88            | 953.03          | 0.87                                  |
|                                       | RA (%)     | 47.94             | 52.06           |                                       | 46.50             | 53.50           |                                       |

**Note:** BE refers to binding energy, and RA refers to the relative area of the peak.

## Section 5: Redox properties

**Table S7** Results of the H<sub>2</sub>-TPR analysis for the CeCu catalysts.

| Cat.                              | H <sub>2</sub> consumptions (mmol/g) |        |        |        |
|-----------------------------------|--------------------------------------|--------|--------|--------|
|                                   |                                      | Peak 1 | Peak 2 | Peak 3 |
| Ce <sub>100</sub>                 | Temperature (°C)                     | 575.60 | 589.94 | 641.77 |
|                                   | Area                                 | 4.03   | 1.31   | 6.52   |
| Ce <sub>50</sub> Cu <sub>50</sub> | Temperature (°C)                     | 339.58 | 392.46 | 520.55 |
|                                   | Area                                 | 1.74   | 1.68   | 0.38   |
| Ce <sub>30</sub> Cu <sub>70</sub> | Temperature (°C)                     | 305.51 | 0.00   | 0.00   |
|                                   | Area                                 | 6.65   | 0.00   | 0.00   |
| Ce <sub>10</sub> Cu <sub>90</sub> | Temperature (°C)                     | 255.39 | 0.00   | 0.00   |
|                                   | Area                                 | 5.59   | 0.00   | 0.00   |
| Cu <sub>100</sub>                 | Temperature (°C)                     | 249.28 | 0.00   | 0.00   |
|                                   | Area                                 | 5.02   | 0.00   | 0.00   |

**Table S8** Results of the O<sub>2</sub>-TPO analysis for the CeCu catalysts.

| Cat.                              | O <sub>2</sub> consumptions (mmol/g) |        |        |        |
|-----------------------------------|--------------------------------------|--------|--------|--------|
|                                   |                                      | Peak 1 | Peak 2 | Peak 3 |
| Ce <sub>100</sub>                 | Temperature (°C)                     | 693.42 | 0.00   | 0.00   |
|                                   | Area                                 | 7.09   | 0.00   | 0.00   |
| Ce <sub>50</sub> Cu <sub>50</sub> | Temperature (°C)                     | 180.24 | 536.26 | 694.14 |
|                                   | Area                                 | 0.09   | 0.64   | 0.71   |
| Ce <sub>30</sub> Cu <sub>70</sub> | Temperature (°C)                     | 130.66 | 438.95 | 693.84 |
|                                   | Area                                 | 0.02   | 0.23   | 0.68   |
| Ce <sub>10</sub> Cu <sub>90</sub> | Temperature (°C)                     | 85.69  | 399.26 | 599.29 |
|                                   | Area                                 | 0.03   | 0.18   | 0.50   |
| Cu <sub>100</sub>                 | Temperature (°C)                     | 84.09  | 187.15 | 573.07 |
|                                   | Area                                 | 0.02   | 0.06   | 0.67   |

## Section 6: Catalytic activity

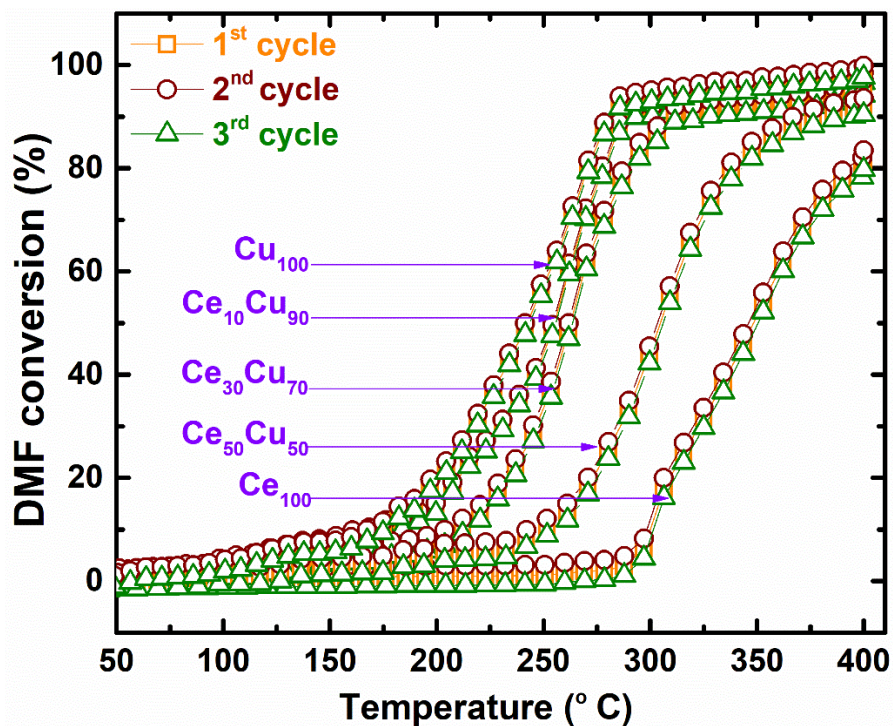

Figure S5. Reproducibility of DMF oxidation over CeCu binary oxides catalysts.

Table S9 Results of DMF conversion and selectivity of products obtained for CeCu binary oxides catalysts.

| Catalysts                         | DMF   | CO <sub>2</sub> | NO <sub>2</sub> |
|-----------------------------------|-------|-----------------|-----------------|
| Ce <sub>100</sub>                 | 81.48 | 66.29           | 33.71           |
| Ce <sub>50</sub> Cu <sub>50</sub> | 91.99 | 62.48           | 37.52           |
| Ce <sub>30</sub> Cu <sub>70</sub> | 95.61 | 56.81           | 43.19           |
| Ce <sub>10</sub> Cu <sub>90</sub> | 97.55 | 56.33           | 43.67           |
| Cu <sub>100</sub>                 | 98.72 | 56.27           | 43.73           |

## References

1. C. K. Fonzeu Monguen, A. El Kasmi, M. F. Arshad, P. M. Kouotou, S. Daniel and Z.-Y. Tian, *Ind. Eng. Chem. Res.*, 2022, **61**, 4546-4560.
2. S. Daniel, C. K. F. Monguen, A. El Kasmi, M. F. Arshad and Z.-Y. Tian, *Catal. Lett.*, 2022, DOI: 10.1007/s10562-022-03977-6.
3. C. K. Fonzeu Monguen, E.-J. Ding, S. Daniel, J.-Y. Jia, X.-H. Gui and Z.-Y. Tian, *Catalysts*, 2023, **16**, 865.
